# Supplementary material
Source: Royal Society of Chemistry journal article supplement (doi:10.1039/d6ew00159a)
Supplement: d6ew00159a1.pdf [file d6ew00159a1.pdf]

## Friend or Foe? The unintended consequences of L-Cysteine in microbiologically influenced corrosion experiments

M.A. Javed<sup>1</sup>, D.C. Fong<sup>1</sup>, S.A. Wade<sup>1,2</sup>

<sup>1</sup>School of Engineering, Swinburne University of Technology, Melbourne, Australia

<sup>2</sup>ARC Training Centre for Biofilm Research and Innovation, Flinders University, Bedford Park, SA, Australia

### Supplementary Data

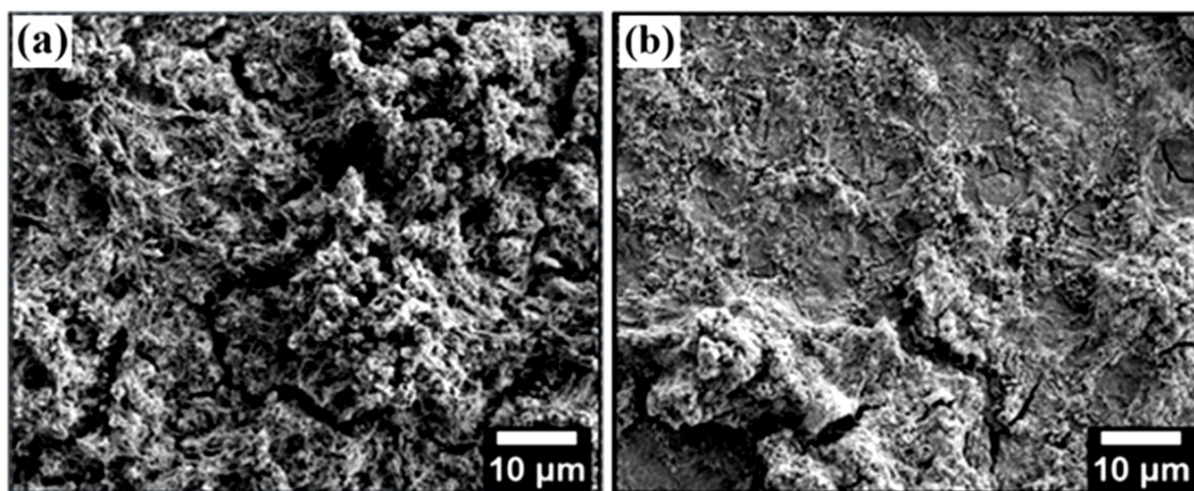

**Figure S1.** Low magnification SEM micrographs of steel samples after 28 days of immersion in biotic media (a) MB-Lc and (b) MB+Lc media inoculated with SRB.

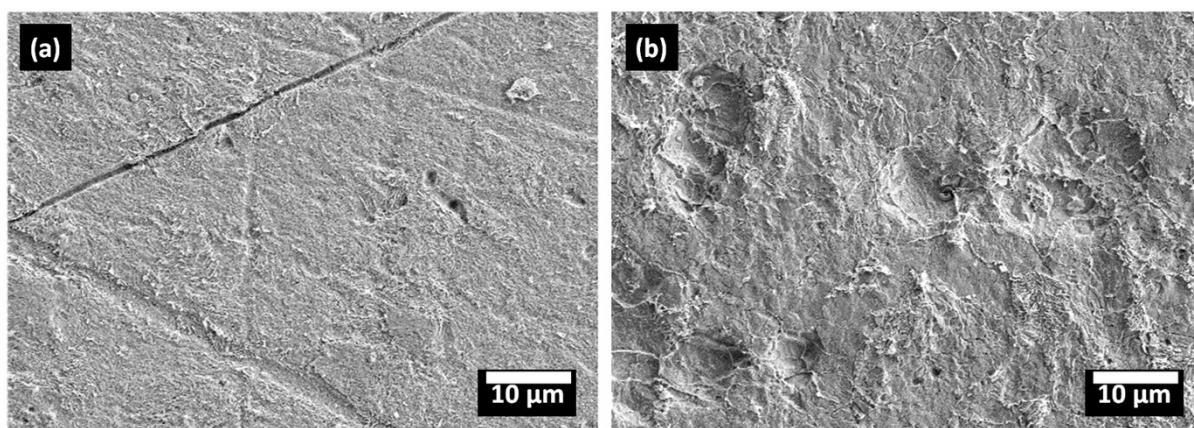

**Figure S2.** SEM micrographs of cleaned steel sample surfaces outside pit regions after 28-day immersion in biotic media (a) MB-Lc and (b) MB+Lc inoculated with SRB.
